# Supplementary material
Source: PubMed Central journal article supplement (PMC7414046)
Supplement: pnas.2008236117.sapp.pdf [file pnas.2008236117.sapp.pdf]

Supplementary Information for

## **Fc-mediated effector function contributes to the *in vivo* antiviral effect of an HIV neutralizing antibody**

**Authors:** Mangaiarkarasi Asokan<sup>1,\*</sup>, Joana Dias<sup>2</sup>, Cuiping Liu<sup>1</sup>, Anna Maximova<sup>1</sup>, Keenan Ernste<sup>1</sup>, Amarendra Pegu<sup>1</sup>, Krisha McKee<sup>1</sup>, Wei Shi<sup>1</sup>, Xuejun Chen<sup>1</sup>, Cassandra Almasri<sup>1</sup>, Wanwisa Promsote<sup>2</sup>, David R. Ambrozak<sup>2</sup>, Lucio Gama<sup>2</sup>, Jianfei Hu<sup>3</sup>, Daniel C. Douek<sup>3</sup>, John-Paul Todd<sup>4</sup>, Jeffrey D. Lifson<sup>5</sup>, Slim Fourati<sup>6</sup>, Rafick P. Sekaly<sup>6</sup>, Andrew R. Crowley<sup>7</sup>, Margaret E. Ackerman<sup>7</sup>, Sung Hee Ko<sup>8</sup>, Divya Kilam<sup>8</sup>, Eli A. Boritz<sup>8</sup>, Laura E. Liao<sup>9</sup>, Katharine Best<sup>9</sup>, Alan S. Perelson<sup>9</sup>, John R. Mascola<sup>1</sup>, and Richard A. Koup<sup>2,\*</sup>

\*Correspondence:

Richard A Koup, MD  
40 Convent Drive  
Vaccine Research Center  
National Institutes of Health  
Bethesda,  
MD 20892  
+1 301-594-8585  
[rkoup@mail.nih.gov](mailto:rkoup@mail.nih.gov)

Mangaiarkarasi Asokan, PhD  
40 Convent Drive  
Vaccine Research Center  
National Institutes of Health  
Bethesda,  
MD 20892  
+1 240-669-5774  
[asokan.mangaiarkarasi@nih.gov](mailto:asokan.mangaiarkarasi@nih.gov)

**This PDF file includes:**

Figures S1 to S11

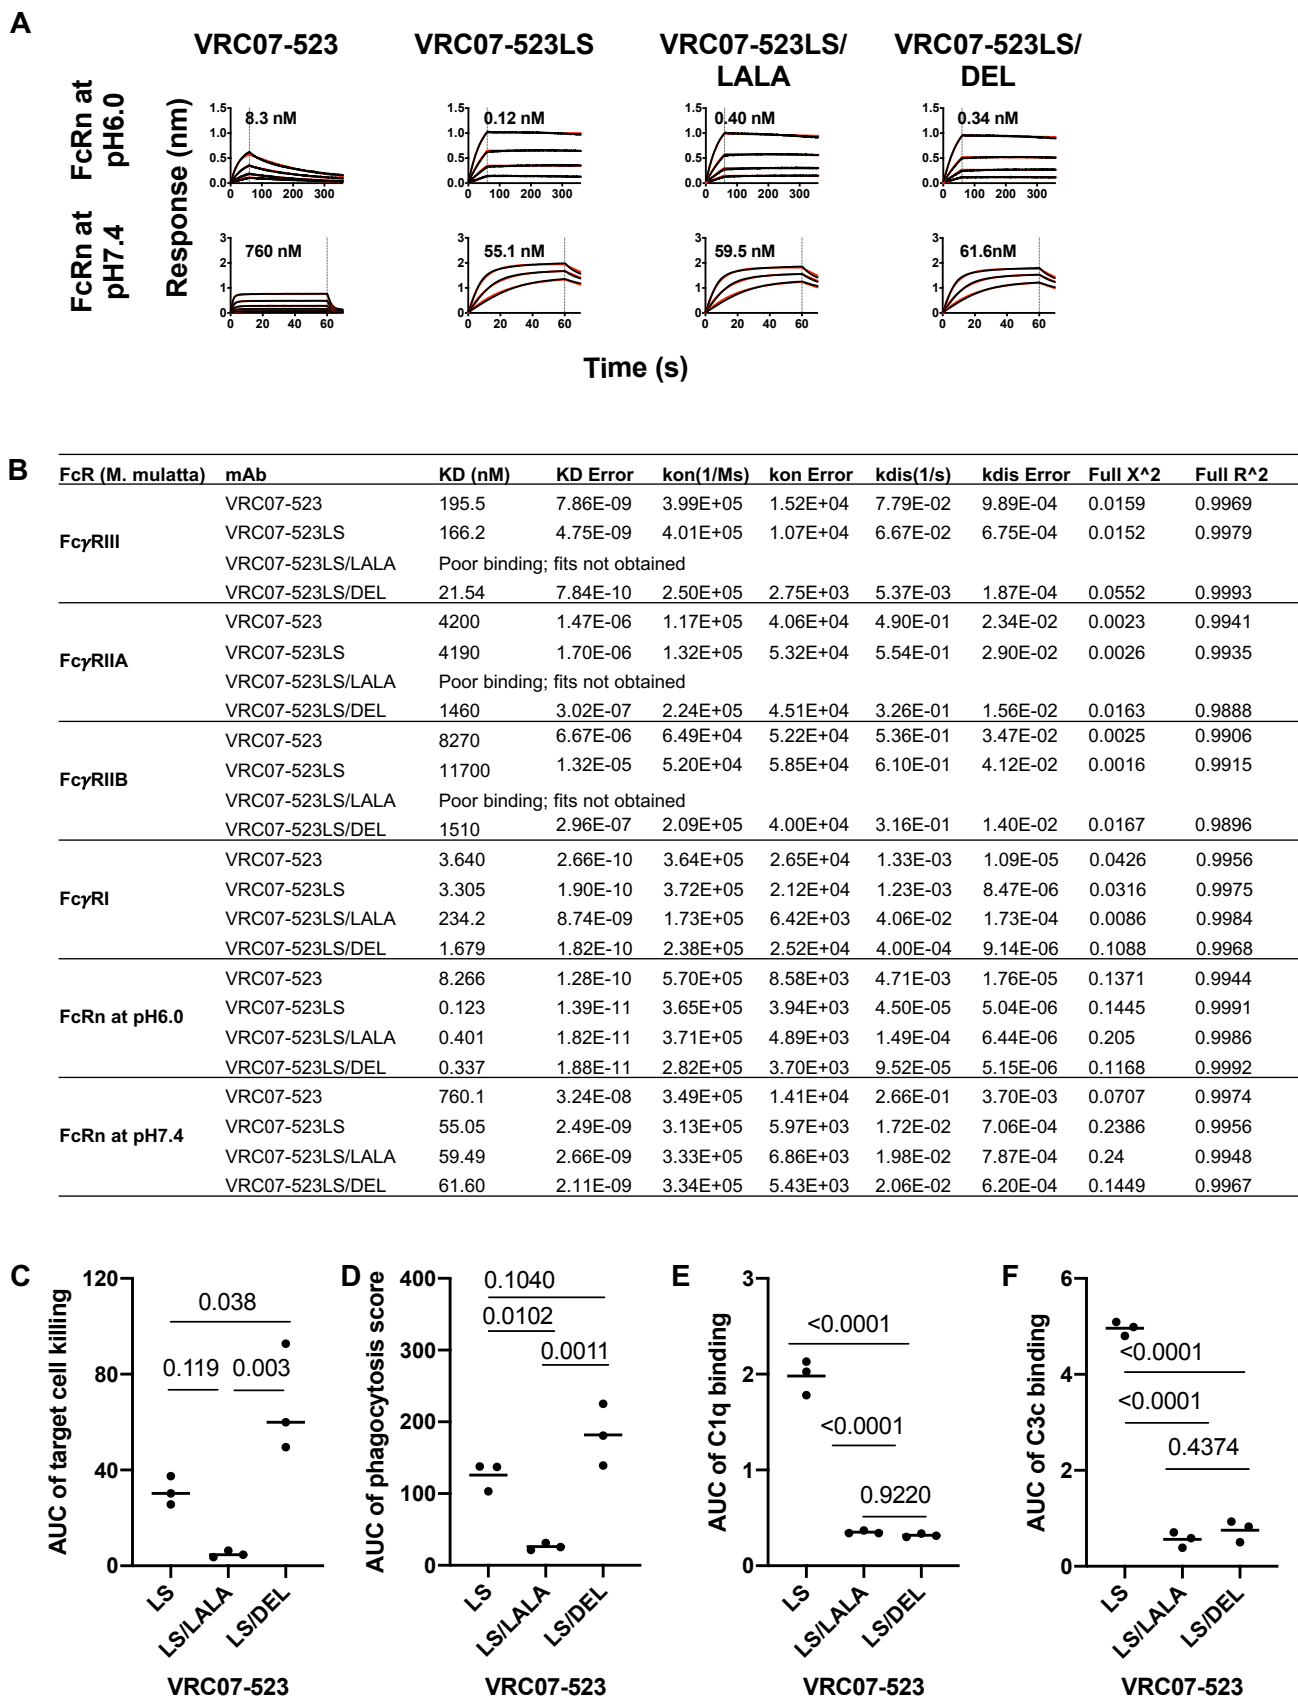

**Figure S1:** A) Binding kinetics of the antibodies to rhesus FcRn at pH6.0 or 7.4. Curves were fitted to a 1:1 binding model. Black lines show measured data and red lines are the fits.  $K_D$  values are shown within each graph. B) Summary of  $K_D$ , association and dissociation rates along with errors, and the fit parameters for all Fc receptors. C) Area under the curve for target-cell killing mediated by NK cells isolated from 3 rhesus macaques. D) AUC for phagocytosis performed on THP-1 cells. E, F) AUC for binding to C1q or C3c for serum isolated from three rhesus macaques. P-values were calculated by one-way ANOVA.

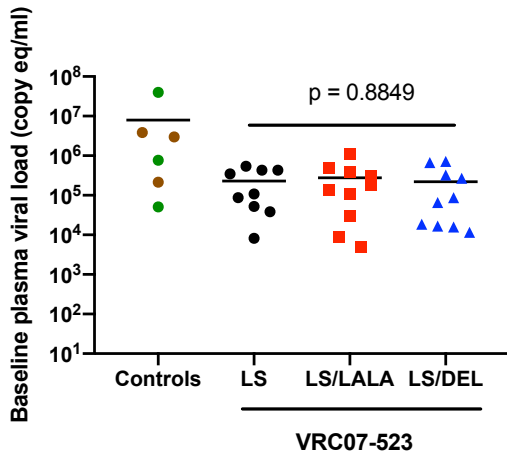

**Figure S2:** Comparison of pre-treatment viral loads across treatment groups. Baseline was calculated as mean of plasma viral load at 48h, 24h and 30 min before NAb infusion. P-values were calculated using one-way ANOVA.

**A**

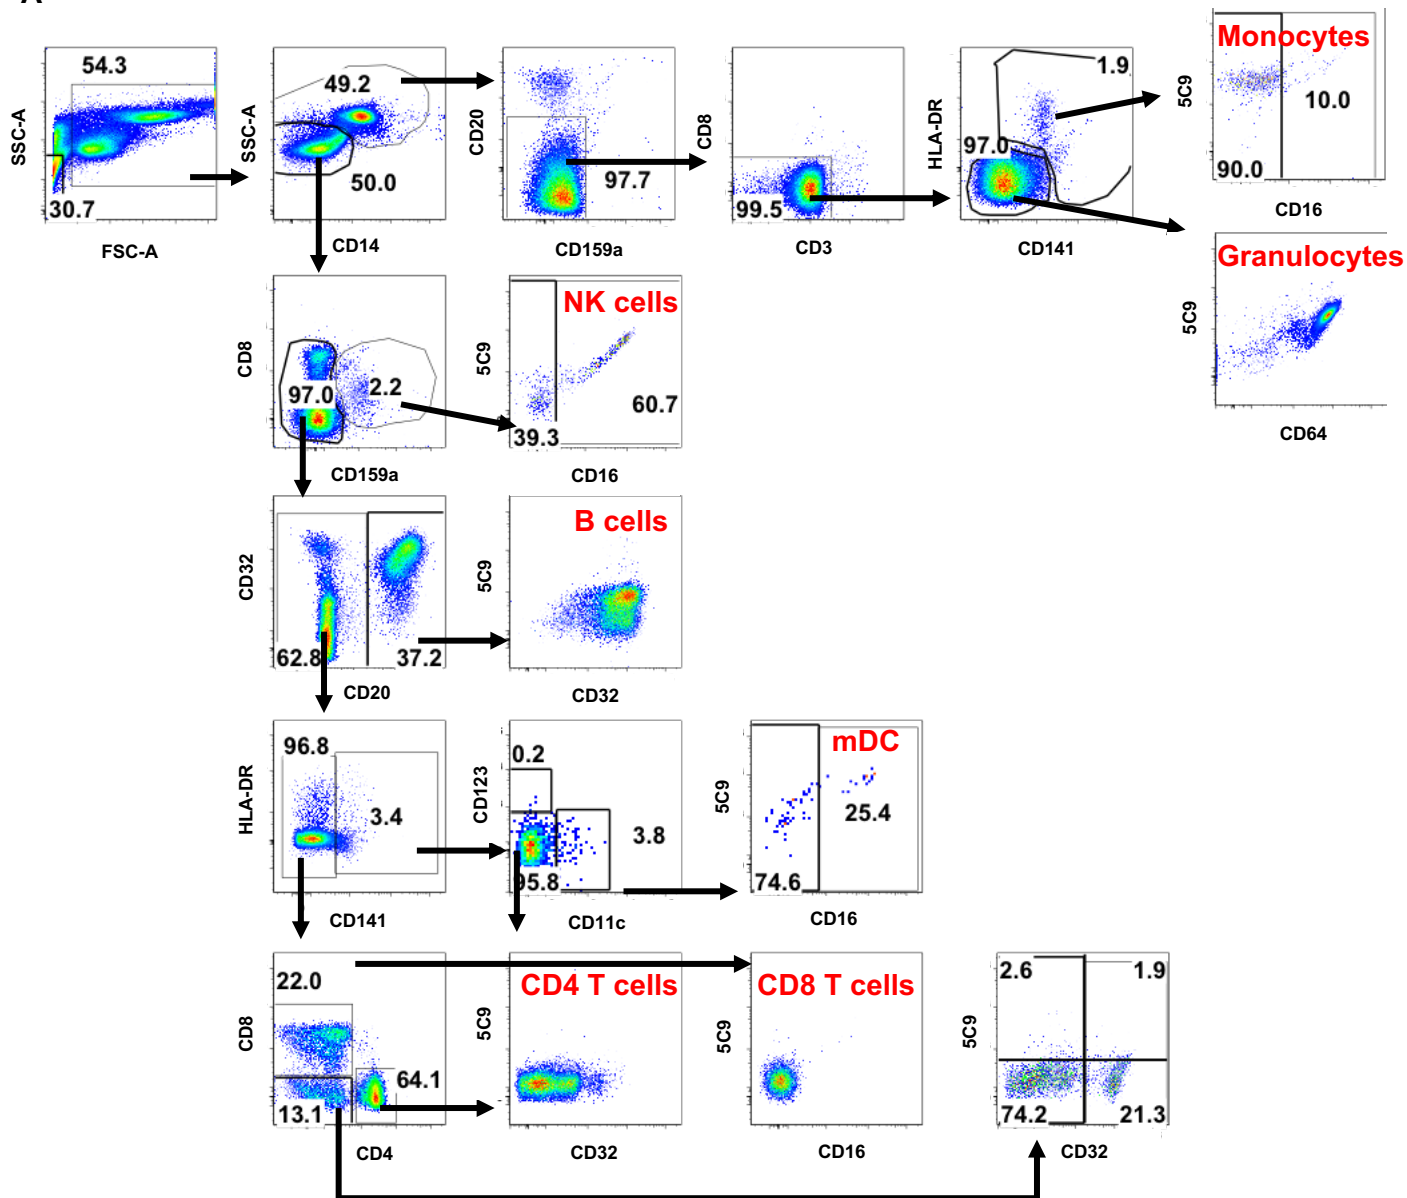

**Figure S3:** Representative flow cytometry gating strategy of whole blood sample stained with lineage markers, Fc $\gamma$  receptors and anti-Id against VRC07-523LS (5C9).

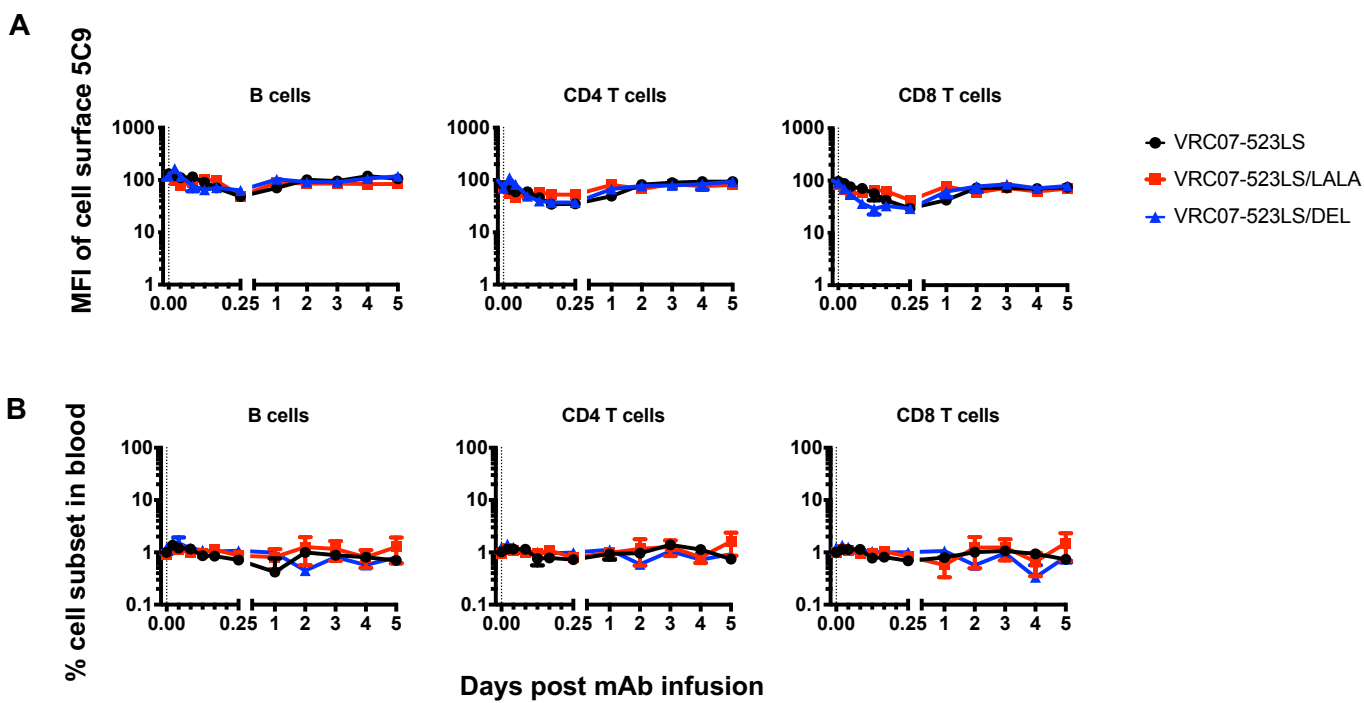

**Figure S4:** A) Levels of cell-surface bound NAb and B) Changes in cell subset frequency on B cells, CD4 T cells and CD8 T cells

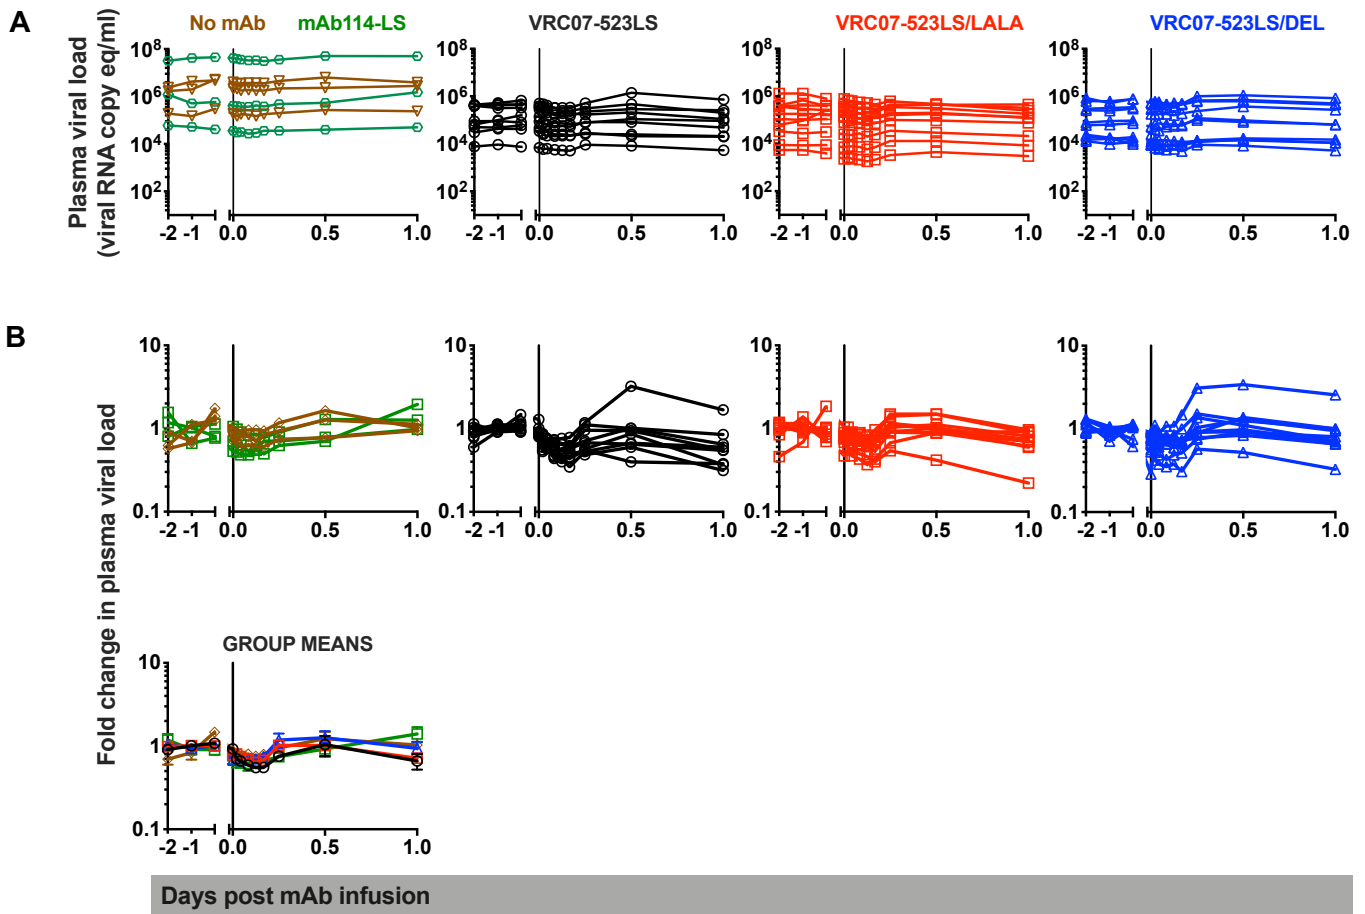

**Figure S5:** a) Plasma viral loads pre-infusion and until day 1 post infusion b) Fold change in plasma viral load normalized to baseline shown for individual animals as well as for group means

**A**

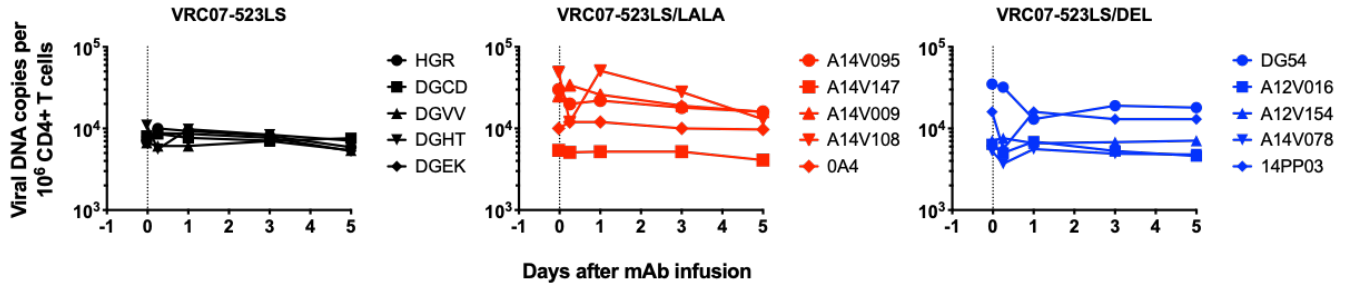

**B**

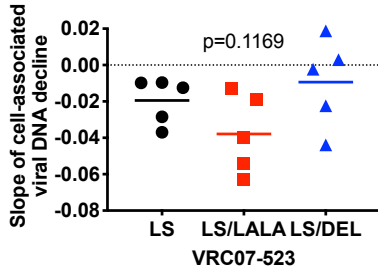

**Figure S6: Cell-associated viral DNA.** A) Sorted CD4+ T cells from frozen PBMC were assayed for levels of viral DNA at 30 mins before NAb infusion and 6h, days 1, 3 and 5 post NAb infusion. B) Slopes of change in cell-associated viral DNA load were calculated by linear regression analysis and p-values were calculated by one-way ANOVA.

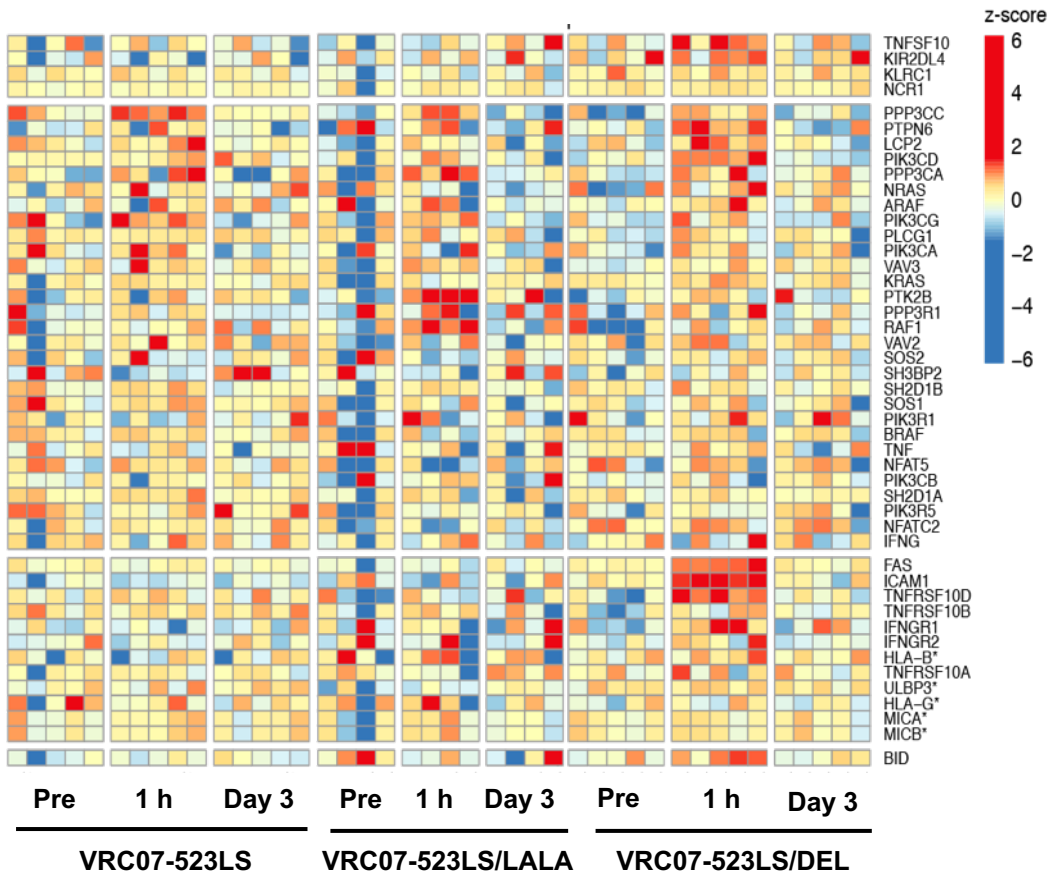

**Figure S7:** Heatmap showing the SLEA z-score of genes in the NK cell-mediated ADCC pathway



| NK cells                                                        |           |                                                                                                                                                                                                                                                                                                                                                                                                         |
|-----------------------------------------------------------------|-----------|---------------------------------------------------------------------------------------------------------------------------------------------------------------------------------------------------------------------------------------------------------------------------------------------------------------------------------------------------------------------------------------------------------|
| NAME                                                            | FDR q-val | Genes                                                                                                                                                                                                                                                                                                                                                                                                   |
| KEGG_NOD_LIKE_RECEPTOR_SIGNALING_PATHWAY                        | 1.14E-04  | NFKB1,NFKBIA,BIRC2,NFKBIB,RELA,TAB2,MAPK12,TNFAIP3                                                                                                                                                                                                                                                                                                                                                      |
| KEGG_MAPK_SIGNALING_PATHWAY                                     | 0.00142   | NFKB2,FAS,NFKB1,RELB,GADD45B,TP53,MAP2K3,MAP3K8,RELA,MAP2K7,TAB2,MYC,MAPK12,TRAF2,MKNK2,PPP3CC,AKT3,FGFR1,MAPK8IP3,NR4A1,CACNA1E,CACNA1A,MAPK11,GADD45A,FGF2,MAPKAPK2,PPP3CA,MAP4K4,NRAS,MAPK7                                                                                                                                                                                                          |
| KEGG_TYPE_1_DIABETES_MELLITUS                                   | 0.00544   | FAS,HSPD1,CPE,LTA,HLA-DOB                                                                                                                                                                                                                                                                                                                                                                               |
| KEGG_APOPTOSIS                                                  | 0.00637   | FAS,NFKB1,TP53,NFKBIA,BIRC2,TNFRSF10D,RELA,TNFSF10,TRAF2,CFLAR,PPP3CC,AKT3,IRAK2,TNFRSF10B,IRAK3,PIK3CD                                                                                                                                                                                                                                                                                                 |
| KEGG_RIG_1_LIKE_RECEPTOR_SIGNALING_PATHWAY                      | 0.00687   | NFKB1,TANK,NFKBIA,NFKBIB,CYLD,RELA,MAPK12,TRAF2,TRAF3                                                                                                                                                                                                                                                                                                                                                   |
| KEGG_PROSTATE_CANCER                                            | 0.0101    | NFKB1,TP53,NFKBIA,CREB1,TCF7,RELA,NKX3-1,MTOR,AKT3,FGFR1,PIK3CD,CCND1,IGF1R                                                                                                                                                                                                                                                                                                                             |
| KEGG_TOLL_LIKE_RECEPTOR_SIGNALING_PATHWAY                       | 0.0144    | NFKB1,NFKBIA,MAP2K3,MAP3K8,RELA,MAP2K7,TAB2,MAPK12,TRAF3,AKT3,PIK3CD,MAPK11,IRF5,TLR2,TBK1                                                                                                                                                                                                                                                                                                              |
| KEGG_T_CELL_RECEPTOR_SIGNALING_PATHWAY                          | 0.0180    | NFKB1,NFKBIA,NFKBIE,MAP3K8,NFKBIB,RELA,MAP2K7,MAPK12,BCL10,TEC,PPP3CC,PTPN6,AKT3,CTLA4,LCP2,DLG1,PIK3CD,ICOS,MAPK11,CARD11,PPP3CA,NRAS                                                                                                                                                                                                                                                                  |
| KEGG_CYTOSOLIC_DNA_SENSING_PATHWAY                              | 0.0197    | NFKB1,NFKBIA,NFKBIB,RELA,POLR3A,POLR1C                                                                                                                                                                                                                                                                                                                                                                  |
| KEGG_GRAFT_VERSUS_HOST_DISEASE                                  | 0.0211    | FAS,HLA-DOB                                                                                                                                                                                                                                                                                                                                                                                             |
| KEGG_SMALL_CELL_LUNG_CANCER                                     | 0.0257    | NFKB1,TP53,NFKBIA,BIRC2,RELA,MYC,TRAF2,TRAF3,AKT3,PIK3CD,TRAF1,LAMA4,CCND1,TRAF5                                                                                                                                                                                                                                                                                                                        |
| KEGG_B_CELL_RECEPTOR_SIGNALING_PATHWAY                          | 0.0307    | NFKB1,NFKBIA,NFKBIE,NFKBIB,RELA,BCL10,PPP3CC,PTPN6,AKT3,PIK3CD,CARD11,PPP3CA,CD72,NRAS                                                                                                                                                                                                                                                                                                                  |
| KEGG_ALLOGRAFT_REJECTION                                        | 0.0440    | FAS,HLA-DOB                                                                                                                                                                                                                                                                                                                                                                                             |
| KEGG_EPITHELIAL_CELL_SIGNALING_IN_HELICOBACTER_PYLORI_INFECTION | 0.0496    | NFKB1,NFKBIA,RELA,MAPK12,GIT1,MAPK11,ATP6V1C2                                                                                                                                                                                                                                                                                                                                                           |
| KEGG_ACUTE_MYELOID_LEUKEMIA                                     | 0.0301    | NFKB1,TCF7,RELA,MYC,STAT5A,MTOR,AKT3,PIK3CD,RPS6KB1,CCND1,ZBTB16,RARA,PPARD,NRAS,TCF7L2,LEF1,ARAF,PIK3CG,EIF4EBP1,PIK3CA                                                                                                                                                                                                                                                                                |
| KEGG_P53_SIGNALING_PATHWAY                                      | 6.84E-04  | FAS,GADD45B,TP53,CCNG2,CCND2,CD82,TP53I3,TNFRSF10B,CCND1,SESN1,SESN2,BID,SIAH1,GADD45A                                                                                                                                                                                                                                                                                                                  |
| KEGG_LEISHMANIA_INFECTION                                       | 0.0259    | NFKB1,NFKBIA,NFKBIB,RELA,TAB2,MAPK12,PTPN6,IFNGR1,HLA-DOB,MAPK11,TLR2,IFNGR2,TGFB2,HLA-DOA,TRAF6,IRAK1,ITGAM,NCF4                                                                                                                                                                                                                                                                                       |
| KEGG_NEUROTROPHIN_SIGNALING_PATHWAY                             | 0.0295    | NFKB1,TP53,NFKBIA,NFKBIE,SH2B3,NFKBIB,RELA,MAP2K7,MAPK12,AKT3,IRAK2,IRAK3,PIK3CD,MAPK11,MAPKAPK2,CAMK4,NRAS,MAPK7,IRS2,YWHAH,PIK3CG,PLCG1,PIK3CA,FRS2                                                                                                                                                                                                                                                   |
| Monocytes                                                       |           |                                                                                                                                                                                                                                                                                                                                                                                                         |
| NAME                                                            | FDR q-val | Genes                                                                                                                                                                                                                                                                                                                                                                                                   |
| KEGG_CYTOKINE_CYTOKINE_RECEPTOR_INTERACTION                     | 4.94E-04  | TNFRSF18,TNFSF8,TNFRSF10B,CSF2RA,TNFRSF10C,FLT1,CXCL3,IL1R2,CCL4L2,IL4R,IL1B,CCL4,CSF1,IL2RG,CD40,IL21R,FAS,TNFRSF10D,IL1A,IL7,IFNGR2,CCL22,CCL2,CXCR5,TNFSF15,TNFRSF1B,IL10,CXCL16,TGFB2,IL7R,IL6,TNFRSF6B,TNFRSF11A,CSF2RB,ACVR2A,CLCF1,VEGFB,PF4,IL1RAP,CCR1,TNFRSF9,IL3RA,IL6ST,IL12RB2,TNFRSF25,LIF,TNFRSF14,CCR7,CCL5,TGFB3,CCL20,TNFSF4,PDGFRB,OSM,IL23A,IL2RA,IL24,TNFRSF8,IFNAR2,PPBP,CCR5,TNF |
| KEGG_APOPTOSIS                                                  | 0.0221    | NFKB1,TNFRSF10B,BCL2L1,TNFRSF10C,NFKBIA,IL1B,BIRC2,BID,IRAK2,MYD88,FAS,CFLAR,TNFRSF10D,IL1A,PIK3R5,PIK3CD,NTRK1,BCL2,AKT2,CSF2RB,RELA,TRAF2,IL1RAP,IL3RA                                                                                                                                                                                                                                                |
| KEGG_RIBOSOME                                                   | 0.0228    | RPS12,RPS29,RPS26,RPL21,RPL31,RPL24,RPL22L1,RPL18A,RPL5,RPS6,RPSA,RPS8,RPL10A,FAU,RPL4,RPS13,RPS21,RPS24,RPL17,RPL19,RPS10,RPS3A,RPL35,RPS27A,RPS5,RPL23,RPS15,RPL30,RPL27A,RPS20,RPS3,RPL8,RPL3,RPS23,RPL14,RPL26,RPS4Y1,RPL9,RSL24D1,RPL28,RPL7,RPL11,RPL13,RPL7A,RPL13A                                                                                                                              |
| KEGG_SMALL_CELL_LUNG_CANCER                                     | 0.0153    | NFKB1,BCL2L1,TRAF1,TRAF3,NFKBIA,FN1,BIRC2,E2F3,CCND1,LAMB3,ITGAV,PIAS2,LAMC1,MYC,PIK3R5,PIK3CD,ITGA6,LAMA5,BCL2,AKT2,RELA,TRAF2,CDK6,CDKN2B,PIK3CG                                                                                                                                                                                                                                                      |
| KEGG_PATHWAYS_IN_CANCER                                         | 0.0188    | NFKB1,NFKB2,BCL2L1,CSF2RA,TRAF1,MITF,TRAF3,NFKBIA,WNT5A,FN1,PPARG,BIRC2,PPARD,FZD7,NKX3-1,BID,E2F3,JAK1,FK,CCND1,MMP9,FAS,LAMB3,ITGAV,PIAS2,LAMC1,MYC,PIK3R5,PIK3CD,NTRK1,STAT3,SP1,ITGA6,TCEB1,SMAD3,TGFB2,ARAF,SLC2A1,IL6,LAMA5,BCL2,AKT2,CTNNB1,RALGDS,BRAF,HDAC2,EPAS1,VEGFB,RELA,TRAF2,RALA,CDK6,BCR,CDKN2B,HIF1A,PIK3CG,LEF1,XIAP,TGFB3                                                           |
| KEGG_AUTOIMMUNE_THYROID_DISEASE                                 | 0.0280    | CD80,CD40,FAS,IL10,HLA-DQA1,HLA-DQB1,CD86,HLA-DPA1,CTLA4,CD28,HLA-DRB1                                                                                                                                                                                                                                                                                                                                  |
| KEGG_GRAFT_VERSUS_HOST_DISEASE                                  | 0.0316    | IL1B,CD80,FAS,IL1A,IL6,HLA-DQA1,HLA-DQB1,TNF,CD86,HLA-DPA1,KLRD1,CD28,HLA-DRB1                                                                                                                                                                                                                                                                                                                          |
| KEGG_ALLOGRAFT_REJECTION                                        | 0.0351    | CD80,CD40,FAS,IL10,HLA-DQA1,HLA-DQB1,TNF,CD86,HLA-DPA1,CD28,HLA-DRB1                                                                                                                                                                                                                                                                                                                                    |
| KEGG_HEMATOPOIETIC_CELL_LINEAGE                                 | 0.00198   | CSF2RA,TFRC,IL1R2,IL4R,IL1B,CD14,CD44,CSF1,CD22,IL1A,IL7,GP1BA,ITGA6,IL7R,IL6,ANPEP,CD9,CD36,GP9,IL3RA,CD19,FCGR1A,MS4A1,CD8A,ITGA2B,IL2RA,CD3E,ETF                                                                                                                                                                                                                                                     |
| KEGG_JAK_STAT_SIGNALING_PATHWAY                                 | 0.00239   | BCL2L1,CSF2RA,JAK3,IL4R,CCND2,JAK1,IL2RG,IL21R,CCND1,IL7,PIAS2,CISH,IFNGR2,MYC,PIK3R5,SOC3S,PIK3CD,STAT3,IL10,IL7R,IL6,AKT2,CSF2RB,SOC2S,CLCF1,SPRED2,IL3RA,IL6ST,PIK3CG,IL12RB2,LIF,SPRY2,SPRY4,OSM,IL23A,IL2RA,IL24,IFNAR2,SOC4,STAT4                                                                                                                                                                 |
| KEGG_FOCAL_ADHESION                                             | 0.0423    | SRC,ACTG1,FLT1,VAV1,FN1,CCND2,BIRC2,ACTN1,FLNB,CCND1,LAMB3,ITGAV,LAMC1,VAV3,PIK3R5,PIK3CD,ITGA6,VWF,RAPGEF1,LAMA5,BCL2,AKT2,CTNNB1,BRAF,PXN,VEGFB,ACTN4,SHC2,ITGA9,PIK3CG,XIAP,PDGFRB,ITGA2B,LAMA2,ZYX,ITGB5,MYLK                                                                                                                                                                                       |
| KEGG_NATURAL_KILLER_CELL_MEDIATED_CYTOTOXICITY                  | 0.0446    | ICAM1,TNFRSF10B,TNFRSF10C,HCST,VAV1,BID,FAS,NFATC1,LCP2,TNFRSF10D,NFAT5,NCR1,IFNGR2,VAV3,PIK3R5,PIK3CD,ARAF,BRAF,CD247,SHC2,PIK3CG                                                                                                                                                                                                                                                                      |

**Figure S8:** Table showing the list of pathways and genes upregulated at 1h post infusion of VRC07-523LS/DEL NAb in NK cells and monocytes



B

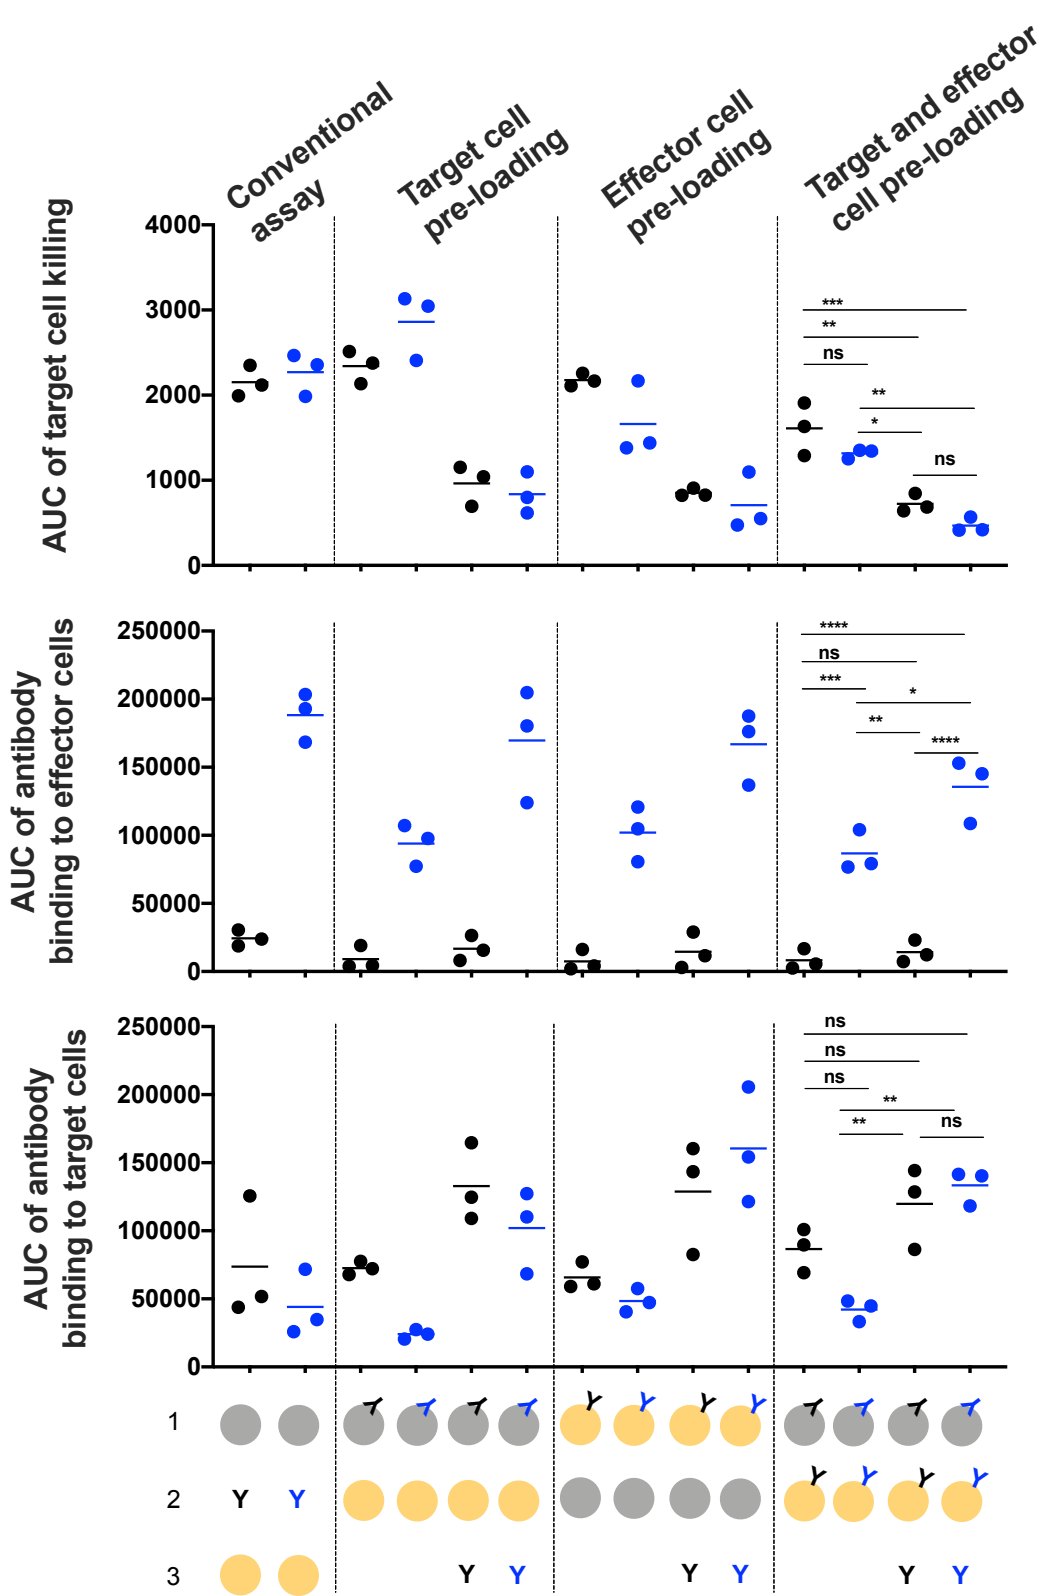

**Figure S9: Prozone effect *in vitro*.** A) ADCC assays were performed using CEM-SHIV<sub>SF162P3</sub> as targets (grey circles) and KHYG-Rh cell lines expressing FcγRIII as effectors (orange circles). Y represents VRC07-523LS and Y represents VRC07-523LS/DEL. Brackets are shown to indicate test conditions where cells were pre-incubated with the antibody and washed before adding to the ADCC assay. In some assays, additional NAb was added during the culture shown as +Y or +Y. Data are representative of at least 3 experiments. B) AUC for data in extended data figure 7a were calculated and analyzed by one way ANOVA with Tukey's correction. P values are presented as ns = not significant, \* <0.05, \*\* <0.005, \*\*\* <0.0005 and \*\*\*\* <0.0001.

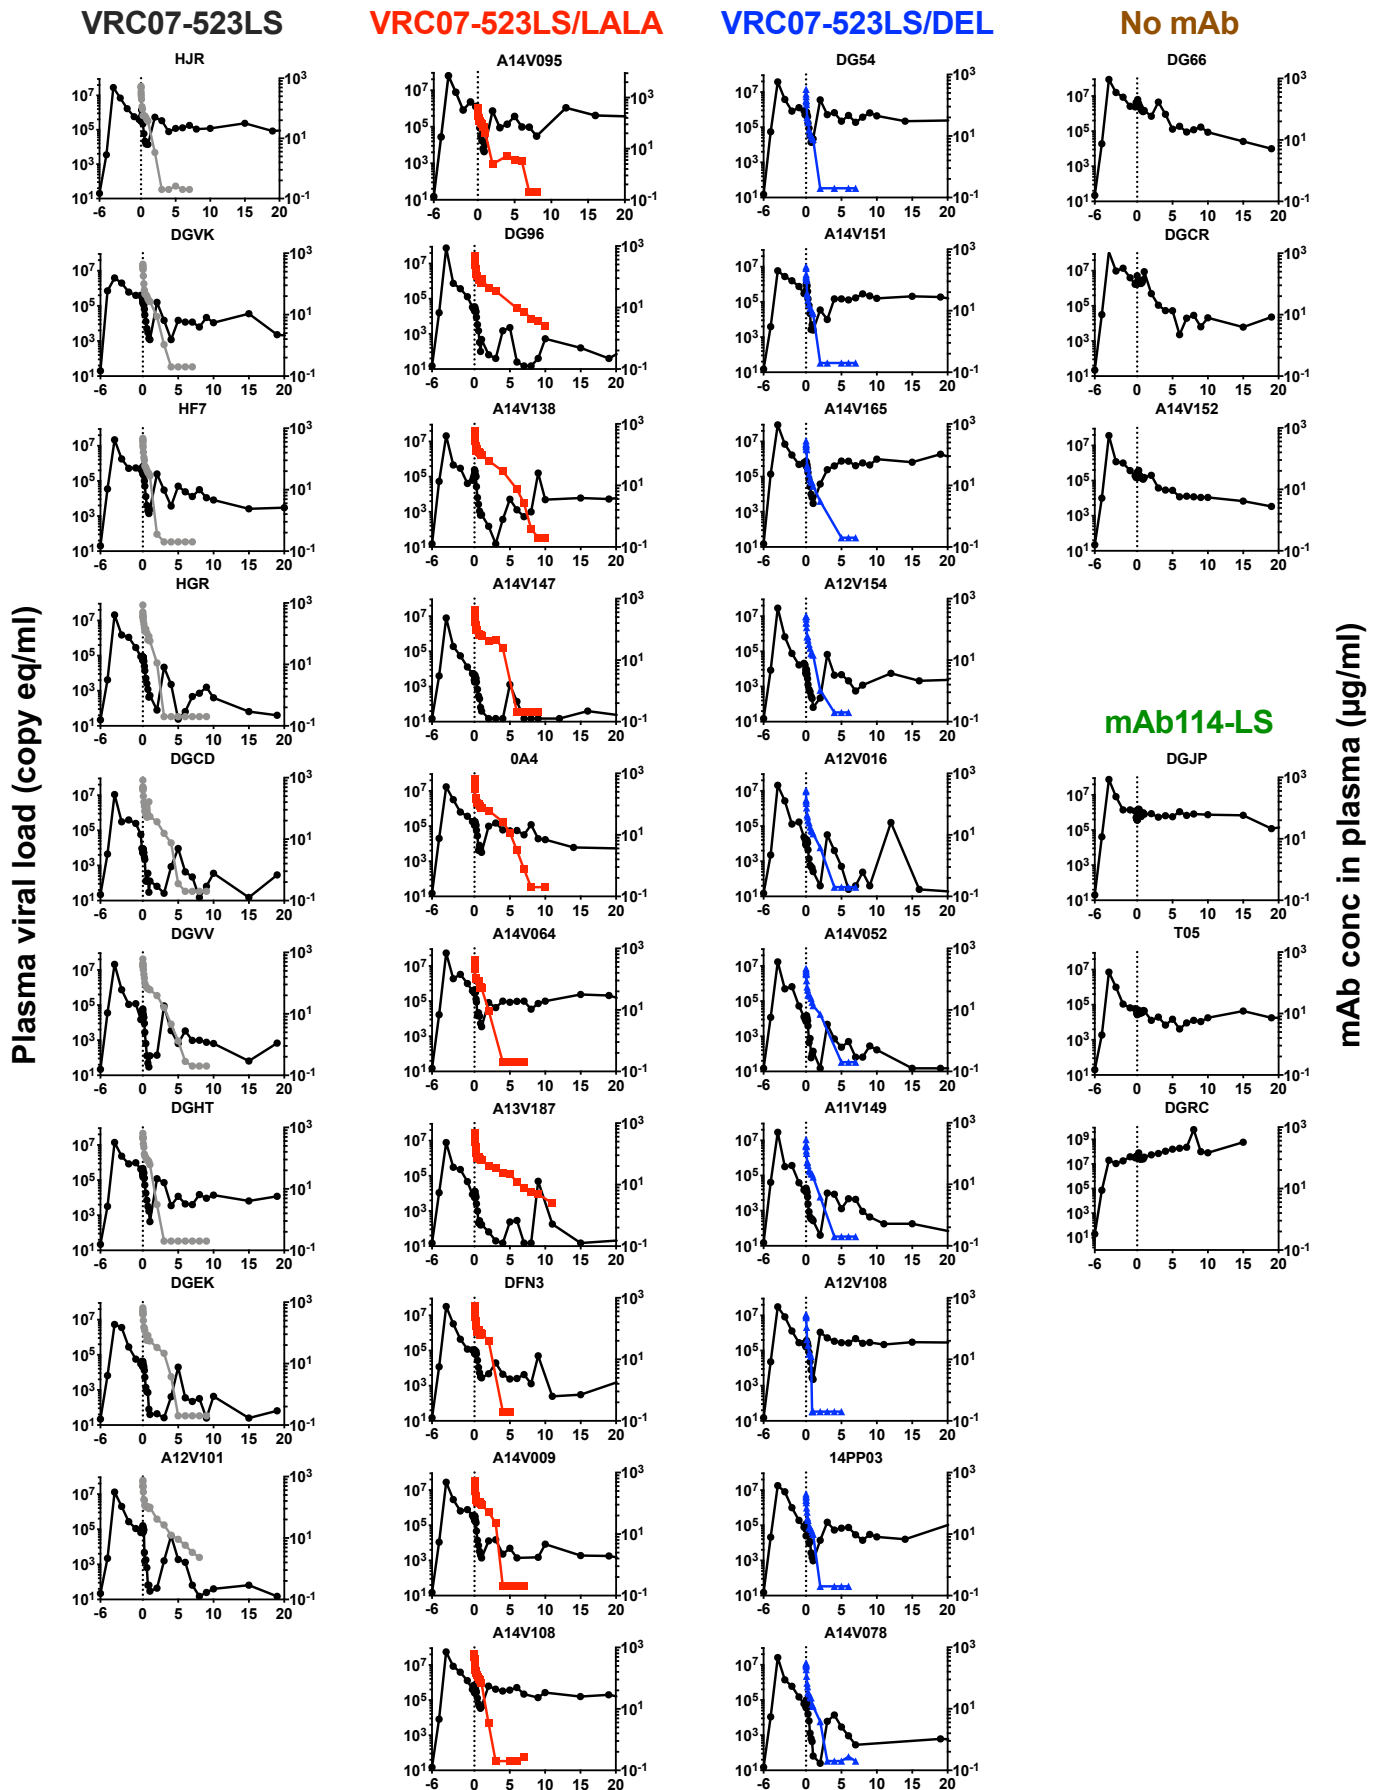

**Figure S10: Long-term follow-up of plasma viral load.** Rhesus macaques were challenged iv with SHIV<sub>SF162P3</sub> at week -6 and treated with 20 mg/kg of NAb at week 0 (shown as vertical dotted lines). Viral load is shown as black lines (left Y-axis) and circulating NAb levels in colored lines (right Y axis).

A

|              |            |            |            |            |            |             |            |            |            |            |            |            |            |            |            |        |
|--------------|------------|------------|------------|------------|------------|-------------|------------|------------|------------|------------|------------|------------|------------|------------|------------|--------|
| SHIV SF162P3 | MRVKGIRKNN | QHLWRGGTLL | LGMLMICSVA | EKLWVTVYVG | VPVWKEATT  | LPCASDAKAY  | DTEVHNWAT  | HACVPTDPNP | QEIVLENVTE | NFNMWKNNMV | EQMHEDIISL | WDQSLKPCVK | LTPLCVTLHC | TNLENATNTT | SSNWKEMNRG | 150    |
| DGVK         | -----      | -----      | -----      | -----      | -----      | -----       | -----      | -----      | -----      | -----      | -----      | -----      | -----      | -----      | -----      | -----  |
| HF7          | -----      | -----      | -----      | -----      | -----      | -----       | -----      | -----      | -----      | -----      | -----      | -----      | -----      | -----      | -----      | -----  |
| HJR          | -----      | -----      | -----      | -----      | -----      | -----       | -----      | -----      | -----      | -----      | -----      | -----      | -----      | -----      | -----      | -----  |
| A14V064      | -----      | -----      | -----      | -----      | -----      | -----       | -----      | -----      | -----      | -----      | -----      | -----      | -----      | -----      | -----      | -----  |
| A14V108      | -----      | -----      | -----      | -----      | -----      | -----       | -----      | -----      | -----      | -----      | -----      | -----      | -----      | -----      | -----      | -----  |
| DFN3         | -----      | -----      | -----      | -----      | -----      | -----       | -----      | -----      | -----      | -----      | -----      | -----      | -----      | -----      | -----      | -----  |
| A14V151      | -----      | -----      | -----      | -----      | -----      | -----       | -----      | -----      | -----      | -----      | -----      | -----      | -----      | -----      | -----      | -----  |
| A11V149      | -----      | -----      | -----      | -----      | -----      | -----       | -----      | -----      | -----      | -----      | -----      | -----      | -----      | -----      | N-----     | -----  |
| A12V108      | -----      | -----      | -----      | -----      | -----      | -----       | -----      | -----      | -----      | -----      | -----      | -----      | -----      | -----      | -----      | -----  |
| SHIV SF162P3 | EIKNCSFNVT | TSIGNKMQKE | YALFYKLDVV | PIDSDNTSYN | LINCNTSVIT | QACPKVSFEP  | IPIHYCAPAG | FAILKNDKK  | FNGSGPCINV | STVQCTHGIR | PVVSTQLLLN | GSLAEEGVVI | RSENFDTNVK | TIIVQLKESV | EINCTRPNNN | 300    |
| DGVK         | -----      | -----      | -----      | S--N--     | -----      | -----       | -----      | -----      | -----      | -----      | -----      | -----      | -----      | -----      | -----      | -----  |
| HF7          | -----      | -----      | -----      | --N--      | -----      | -----       | -----      | -----      | -----      | -----      | -----      | -----      | -----      | -----      | -----      | -----  |
| HJR          | -----      | -----      | -----      | --N--      | -----      | -----       | -----      | -----      | -----      | -----      | -----      | -----      | -----      | -----      | -----      | -----  |
| A14V064      | -----      | -----      | -----      | --N--      | -----      | -----       | -----      | -----      | -----      | -----      | -----      | -----      | -----      | -----      | -----      | -----  |
| A14V108      | -----      | -----      | -----      | --N--      | -----      | -----       | -----      | -----      | -----      | -----      | -----      | -----      | -----      | -----      | -----      | -----  |
| DFN3         | -----      | -----      | -----      | --N--      | -----      | -----       | -----      | -----      | -----      | -----      | -----      | -----      | -----      | -----      | -----      | -----  |
| A14V151      | -----      | -----      | -----      | --N--      | -----      | -----       | -----      | -----      | -----      | -----      | -----      | -----      | -----      | -----      | -----      | -----  |
| A11V149      | -----      | -----      | -----      | --N--      | -----      | -----       | -----      | -----      | -----      | -----      | -----      | -----      | -----      | -----      | -----      | -----  |
| A12V108      | -----      | -----      | -----      | --N--      | -----      | -----       | -----      | -----      | -----      | -----      | -----      | -----      | -----      | -----      | -----      | -----  |
| SHIV SF162P3 | TRKSIPIGPG | KAFYATGDII | GDIRQAHNCI | SGEKWNNTLK | QIVTKLQAF  | ENKTIIVFKQS | SGGDPEIVMH | SFNCGGEFFY | CNSTQLFNST | WNNTIGPNNT | NGTITLPCRI | KQIINRWQEV | GKAMYAPPRI | GQIRCSSNIT | GLLLTRDGGR | 450    |
| DGVK         | -----      | -----      | -----      | -----      | -----      | -----       | -----      | -----      | -----      | -----      | -----      | -----      | -----      | -----      | -----      | -----  |
| HF7          | -----      | -----      | -----      | -----      | -----      | -----       | -----      | -----      | -----      | -----      | -----      | -----      | -----      | -----      | -----      | -----  |
| HJR          | -----      | -----      | -----      | -----      | -----      | -----       | -----      | -----      | -----      | -----      | -----      | -----      | -----      | -----      | -----      | -----  |
| A14V064      | -----      | -----      | -----      | -----      | -----      | -----       | -----      | -----      | -----      | -----      | -----      | -----      | -----      | -----      | -----      | -----  |
| A14V108      | -----      | -----      | -----      | -----      | -----      | -----       | -----      | -----      | -----      | -----      | -----      | -----      | -----      | -----      | -----      | -----  |
| DFN3         | -----      | -----      | -----      | -----      | -----      | -----       | -----      | -----      | -----      | -----      | -----      | -----      | -----      | -----      | -----      | -----  |
| A14V151      | -----      | -----      | -----      | -----      | -----      | -----       | -----      | -----      | -----      | -----      | -----      | -----      | -----      | -----      | -----      | -----  |
| A11V149      | -----      | -----      | -----      | -----      | -----      | -----       | -----      | -----      | -----      | -----      | -----      | -----      | -----      | -----      | -----      | -----  |
| A12V108      | -----      | -----      | -----      | -----      | -----      | -----       | -----      | -----      | -----      | -----      | -----      | -----      | -----      | -----      | -----      | -----K |
| SHIV SF162P3 | EVSNTTEIFR | PGGDMRDNN  | RSELYKYKVV | KIEPLGVAPT | KAKRRVVQRE | KRAVTLGAVF  | LGFLGAAGST | MGAASLTLTV | QARQLLSGIV | QQQNLLLRAI | EAQHLHLLQT | VWGIRQLQAR | VLAVERYLKD | QQLLGIWGCS | GKLICITAVP | 600    |
| DGVK         | -----      | -----      | -----      | -----      | -----      | -----       | -----      | -----      | -----      | -----      | -----      | -----      | -----      | -----      | -----      | -----  |
| HF7          | -----      | -----      | -----      | -----      | -----      | -----       | -----      | -----      | -----      | -----      | -----      | -----      | -----      | -----      | -----      | -----  |
| HJR          | -----      | -----      | -----      | -----      | -----      | -----       | -----      | -----      | -----      | -----      | -----      | -----      | -----      | -----      | -----      | -----  |
| A14V064      | -----      | -----      | -----      | -----      | -----      | -----       | -----      | -----      | -----      | -----      | -----      | -----      | -----      | -----      | -----      | -----  |
| A14V108      | -----      | -----      | -----      | -----      | -----      | -----       | -----      | -----      | -----      | -----      | -----      | -----      | -----      | -----      | -----      | -----  |
| DFN3         | -----      | -----      | -----      | -----      | -----      | -----       | -----      | -----      | -----      | -----      | -----      | -----      | -----      | -----      | -----      | -----  |
| A14V151      | -----      | -----      | -----      | -----      | -----      | -----       | -----      | -----      | -----      | -----      | -----      | -----      | -----      | -----      | -----      | -----  |
| A11V149      | -----      | -----      | -----      | -----      | -----      | -----       | -----      | -----      | -----      | -----      | -----      | -----      | -----      | -----      | -----      | -----  |
| A12V108      | -----      | -----      | -----      | -----      | -----      | -----       | -----      | -----      | -----      | -----      | -----      | -----      | -----      | -----      | -----      | -----  |
| SHIV SF162P3 | WNASWSNKS  | LQIWNMTWM  | EWEREIGNYT | NLIYTLIEES | QNOQEKNEQE | LLELDKWSL   | WNWFDISKWL | WYIKIFIMIV | GGVLGLRIVF | TVLSIVNRVR | QGYSPLSFQT | RFPAPRGLDR | PEGIEEEGGE | RDRDRSRPLV | HGLLALIWDD | 750    |
| DGVK         | -----      | -----      | -----      | -----      | -----      | -----       | -----      | -----      | -----      | -----      | -----      | -----      | -----      | -----      | -----      | -----  |
| HF7          | -----      | -----      | -----      | -----      | -----      | -----       | -----      | -----      | -----      | -----      | -----      | -----      | -----      | -----      | -----      | -----  |
| HJR          | -----      | -----      | -----      | -----      | -----      | -----       | -----      | -----      | -----      | -----      | -----      | -----      | -----      | -----      | -----      | -----  |
| A14V064      | -----      | -----      | -----      | -----      | -----      | -----       | -----      | -----      | -----      | -----      | -----      | -----      | -----      | -----      | -----      | -----  |
| A14V108      | -----      | -----      | -----      | -----      | -----      | -----       | -----      | -----      | -----      | -----      | -----      | -----      | -----      | -----      | -----      | -----  |
| DFN3         | -----      | -----      | -----      | -----      | -----      | -----       | -----      | -----      | -----      | -----      | -----      | -----      | -----      | -----      | -----      | -----  |
| A14V151      | -----      | -----      | -----      | -----      | -----      | -----       | -----      | -----      | -----      | -----      | -----      | -----      | -----      | -----      | -----      | -----  |
| A11V149      | -----      | -----      | -----      | -----      | -----      | -----       | -----      | -----      | -----      | -----      | -----      | -----      | -----      | -----      | -----      | -----  |
| A12V108      | -----      | -----      | -----      | -----      | -----      | -----       | -----      | -----      | -----      | -----      | -----      | -----      | -----      | -----      | -----      | -----  |
| SHIV SF162P3 | LRSCLFSPYH | RLRDLILIAA | RIVELLGRRG | WEALKYWGNL | LQYWIQELKN | SAVSLFGAIA  | IAVAEGTDRI | IEVAQRIGRA | FLHIPRRIRQ | GLERILL    | 847        | -----      | -----      | -----      | -----      | -----  |
| DGVK         | -----      | -----      | -----      | -----      | -----      | -----       | -----      | -----      | -----      | -----      | -----T--   | -----      | -----      | -----      | -----      | -----  |
| HF7          | -----      | -----      | -----      | -----      | -----      | -----       | -----      | -----      | -----      | -----      | -----T--   | -----      | -----      | -----      | -----      | -----  |
| HJR          | -----      | -----      | -----      | -----      | -----      | -----       | -----      | -----      | -----      | -----      | -----T--   | -----      | -----      | -----      | -----      | -----  |
| A14V064      | -----      | -----      | -----      | -----      | -----      | -----       | -----      | -----      | -----      | -----      | -----T--   | -----      | -----      | -----      | -----      | -----  |
| A14V108      | -----      | -----      | -----      | -----      | -----      | -----       | -----      | -----      | -----      | -----      | -----T--   | -----      | -----      | -----      | -----      | -----  |
| DFN3         | -----      | -----      | -----      | -----      | -----      | -----       | -----      | -----      | -----      | -----      | -----T--   | -----      | -----      | -----      | -----      | -----  |
| A14V151      | -----      | -----      | -----      | -----      | -----      | -----       | -----      | -----      | -----      | -----      | -----T--   | -----      | -----      | -----      | -----      | -----  |
| A11V149      | -----      | -----      | -----      | -----      | -----      | -----       | -----      | -----      | -----      | -----      | -----T--   | -----      | -----      | -----      | -----      | -----  |
| A12V108      | -----      | -----      | -----      | -----      | -----      | -----       | -----      | -----      | -----      | -----      | -----T--   | -----      | -----      | -----      | -----      | -----  |

|             |                                                                                                                                                                                                                         |
|-------------|-------------------------------------------------------------------------------------------------------------------------------------------------------------------------------------------------------------------------|
| SHV SF162P3 | M R V K G I R K N Y S H L W R O G L L L O G B L M L T C S A V E K L W V Y E K L W Y V Y Y G V P A W R E A T I L T P C A D A R A Y S E V M N V W A T H A C V T P D P N P G E I L E E N V I E N P N M W R N N M V         |
| DOVK        |                                                                                                                                                                                                                         |
| H7          |                                                                                                                                                                                                                         |
| HJR         |                                                                                                                                                                                                                         |
| A1AV164     |                                                                                                                                                                                                                         |
| A1AV168     |                                                                                                                                                                                                                         |
| DPN3        |                                                                                                                                                                                                                         |
| A1AV149     |                                                                                                                                                                                                                         |
| A1AV168     |                                                                                                                                                                                                                         |
| SHV SF162P3 | E Q M H E D I I S L W D O S L E P C V K L T P L C V T L H C T N L E N A T N T S S N W K E M N R G E I K N C S F N V T T S I O N K M Q K E V A L F Y R L D V P I D N D N T S Y N L I N C N T S I V I                     |
| DOVK        |                                                                                                                                                                                                                         |
| H7          |                                                                                                                                                                                                                         |
| HJR         |                                                                                                                                                                                                                         |
| A1AV164     |                                                                                                                                                                                                                         |
| A1AV168     |                                                                                                                                                                                                                         |
| DPN3        |                                                                                                                                                                                                                         |
| A1AV149     |                                                                                                                                                                                                                         |
| A1AV168     |                                                                                                                                                                                                                         |
| SHV SF162P3 | G A C I P A K V S F E P I P H Y C A P A G F A I L K C N D K K F I N G S I G P C I N V S T Y G C T H G I R P V V S T O G L L I N G S I L A E E G V V I R S E I N F I D O N Y K T I I V G L K E S E V E I N C T R P N N N |
| DOVK        |                                                                                                                                                                                                                         |
| H7          |                                                                                                                                                                                                                         |
| HJR         |                                                                                                                                                                                                                         |
| A1AV164     |                                                                                                                                                                                                                         |
| A1AV168     |                                                                                                                                                                                                                         |
| DPN3        |                                                                                                                                                                                                                         |
| A1AV149     |                                                                                                                                                                                                                         |
| A1AV168     |                                                                                                                                                                                                                         |
| SHV SF162P3 | T R K S I P I G P G K A F A T G I D I R O A H C N I S G E K W N N T L K O I V T K L O A O F E N K T I V F K O S G D P E I I V M H S F N C G G E F F Y C N S T O L F N S T W N N T I G P N N T                           |
| DOVK        |                                                                                                                                                                                                                         |
| H7          |                                                                                                                                                                                                                         |
| HJR         |                                                                                                                                                                                                                         |
| A1AV164     |                                                                                                                                                                                                                         |
| A1AV168     |                                                                                                                                                                                                                         |
| DPN3        |                                                                                                                                                                                                                         |
| A1AV151     |                                                                                                                                                                                                                         |
| A1AV149     |                                                                                                                                                                                                                         |
| A1AV168     |                                                                                                                                                                                                                         |
| SHV SF162P3 | N G T I L P C R I K O I I N R R O E V G K A M Y A P P I R G O I R C S N N I T G L L I R D G R E V N T T E I F R P G G D M R D N W R S E L L Y K V V K I E L P O V A P T K K R R V V O R E                               |
| DOVK        |                                                                                                                                                                                                                         |
| H7          |                                                                                                                                                                                                                         |
| HJR         |                                                                                                                                                                                                                         |
| A1AV164     |                                                                                                                                                                                                                         |
| A1AV168     |                                                                                                                                                                                                                         |
| DPN3        |                                                                                                                                                                                                                         |
| A1AV151     |                                                                                                                                                                                                                         |
| A1AV149     |                                                                                                                                                                                                                         |
| A1AV168     |                                                                                                                                                                                                                         |
| SHV SF162P3 | K R A V T L G A V F L G F L G A A S T M G A S L T V O A R L L S G I V O Q N N L L R A T E A O R L L O L T V W G K O L O A R V L A V E R Y K D O L L G I W G C S G K L I C T T A V P                                     |
| DOVK        |                                                                                                                                                                                                                         |
| H7          |                                                                                                                                                                                                                         |
| HJR         |                                                                                                                                                                                                                         |
| A1AV164     |                                                                                                                                                                                                                         |
| A1AV168     |                                                                                                                                                                                                                         |
| DPN3        |                                                                                                                                                                                                                         |
| A1AV151     |                                                                                                                                                                                                                         |
| A1AV149     |                                                                                                                                                                                                                         |
| A1AV168     |                                                                                                                                                                                                                         |
| SHV SF162P3 | W N A S W N K S L D O I W N N M T W M E W E R E I G N Y T N L I Y T L I E E S O N G O E K N E O L L E L L K W A S L W N W L D I S K W L W Y I K I F I M V G L V G L R I F T L S I V N R V R                             |
| DOVK        |                                                                                                                                                                                                                         |
| H7          |                                                                                                                                                                                                                         |
| HJR         |                                                                                                                                                                                                                         |
| A1AV164     |                                                                                                                                                                                                                         |
| A1AV168     |                                                                                                                                                                                                                         |
| DPN3        |                                                                                                                                                                                                                         |
| A1AV151     |                                                                                                                                                                                                                         |
| A1AV149     |                                                                                                                                                                                                                         |
| A1AV168     |                                                                                                                                                                                                                         |
| SHV SF162P3 | G O G Y S P L S F G T R P P A P R G O L D R P E R P L L Y H G L A L A I W D L R S L C L F L B Y H N R L N D L I L I A A R I V E L L E L L O G R R O W E A L K Y W G N L L O G W I W I G E L N N                         |
| DOVK        |                                                                                                                                                                                                                         |
| H7          |                                                                                                                                                                                                                         |
| HJR         |                                                                                                                                                                                                                         |
| A1AV164     |                                                                                                                                                                                                                         |
| A1AV168     |                                                                                                                                                                                                                         |
| DPN3        |                                                                                                                                                                                                                         |
| A1AV151     |                                                                                                                                                                                                                         |
| A1AV149     |                                                                                                                                                                                                                         |
| A1AV168     |                                                                                                                                                                                                                         |
| SHV SF162P3 | S A V S L F G A I A V A E G T R I E V A Q R I O G R A F L H I P R R I R O G L E R T L L                                                                                                                                 |
| DOVK        |                                                                                                                                                                                                                         |
| H7          |                                                                                                                                                                                                                         |
| HJR         |                                                                                                                                                                                                                         |
| A1AV164     |                                                                                                                                                                                                                         |
| A1AV168     |                                                                                                                                                                                                                         |
| DPN3        |                                                                                                                                                                                                                         |
| A1AV151     |                                                                                                                                                                                                                         |
| A1AV149     |                                                                                                                                                                                                                         |
| A1AV168     |                                                                                                                                                                                                                         |

C

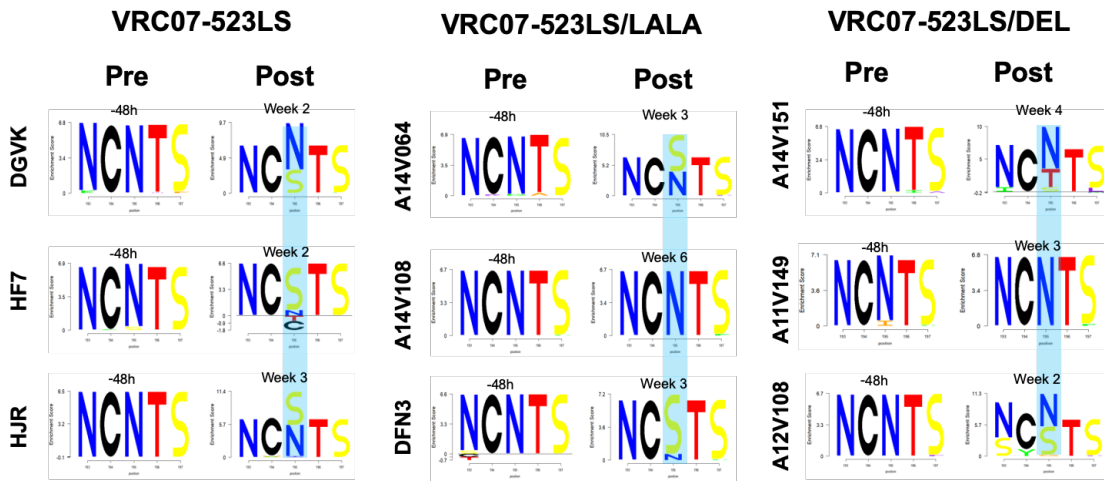

**Figure S11: Env sequencing.** Plasma virus was sequenced from 3 animals per group at 48h prior to NAb infusion and following rebound. A) Animal Ids are highlighted based on NAb group (black for VRC07-523LS, red for LALA and blue for DEL). Sequences are shown here as an alignment of pre-infusion consensus sequences with the Env of SHIV<sub>SF162P3</sub>. B) Sites showing evidence of selection after NAb infusion at a Bonferroni-adjusted Fisher's exact test  $p$  value  $< 10^{-12}$  are shown in blue, with contact sites for a related CD4bs NAb VRC01 shown in orange. C) Web logo plots are shown around the N197 site (blue highlight) at which significant selection was observed in most animals.
